# Supplementary material for: Cysteamine Eye Drops in Hyaluronic Acid Packaged in Innovative Single-Dose Systems, Part II: Long-Term Stability and Clinical Ocular Biopermanence
Source: MDPI journal article supplement (doi:10.3390/pharmaceutics15112589), 2023-11-05
Supplement: s1 [file s1]

# Supplementary Material: Cysteamine Eye Drops in Hyaluronic Acid Packaged in Innovative Single-Dose Systems, Part II: Long-Term Stability and Clinical Ocular Biopermanence

Ana Castro-Balado, Andrea Cuartero-Martínez, Hugo Pena-Verdeal, Gonzalo Hermelo-Vidal, Anja Schmidt, Belén Montero, Manuela Hernández-Blanco, Irene Zarra-Ferro, Miguel González-Barcia, Cristina Mondelo-García, María Jesús Giráldez, Eva Yebra-Pimentel, Francisco J. Otero-Espinar and Anxo Fernández-Ferreiro

**Table S1.** Inclusion and exclusion criteria for participation in the study.

| Inclusion criteria                                                                                   |
|------------------------------------------------------------------------------------------------------|
| Age between 18-40 years                                                                              |
| Signed informed consent                                                                              |
| DEQ5 <6                                                                                              |
| Negative staining or 1 with fluorescein or indocyanine green                                         |
| Exclusion criteria                                                                                   |
| Active ocular pathologies or history of conjunctival, scleral, and corneal disease                   |
| Active ocular treatment                                                                              |
| Allergies or sensitivities to eye drop components.                                                   |
| Previous ocular surgeries within the last year or general surgeries that may affect the measurements |
| Use of contact lenses within the last 24 hours                                                       |
| Regular use of medical devices for eye care (artificial tears in the last 24 hours)                  |
| Diagnosis of dry eye disease                                                                         |
| Symptoms or signs of dry eyes                                                                        |
| Thyroid problems                                                                                     |
| Diabetes mellitus                                                                                    |

DEQ5: Five-item Dry Eye Questionnaire

**Table S2.** Descriptive statistics of Tear Meniscus Height (Mean and Sd displayed for parametric variables). Day 0: unfrozen formulation; Day 30: 30-day frozen formulation; Day 120: 120-day frozen formulation.

| Time (min) | Mean ± sd (mm)<br>Day 0 | Mean ± sd (mm)<br>Day 30 | Mean ± sd (mm)<br>Day 120 |
|------------|-------------------------|--------------------------|---------------------------|
| Baseline   | 0.293 ± 0.072           | 0.285 ± 0.055            | 0.262 ± 0.069             |
| 2          | 0.474 ± 0.090           | 0.449 ± 0.157            | 0.420 ± 0.121             |
| 5          | 0.372 ± 0.099           | 0.396 ± 0.116            | 0.353 ± 0.098             |
| 10         | 0.324 ± 0.079           | 0.322 ± 0.091            | 0.315 ± 0.091             |
| 15         | 0.300 ± 0.064           | 0.302 ± 0.068            | 0.284 ± 0.076             |
| 30         | 0.279 ± 0.078           | 0.284 ± 0.059            | 0.234 ± 0.043             |

**Table S3.** Descriptive statistics of noninvasive keratograph tear breakup time (Mean and SD displayed for parametric variables). Day 0: unfrozen formulation; Day 30: 30-day frozen formulation; Day 120: 120-day frozen formulation.

| Time (min) | Mean ± sd (mm)<br>Day 0 | Mean ± sd (mm)<br>Day 30 | Mean ± sd (mm)<br>Day 120 |
|------------|-------------------------|--------------------------|---------------------------|
| Baseline   | 10.89 ± 3.498           | 11.69 ± 6.228            | 13.14 ± 5.690             |
| 2          | 15.31 ± 6.292           | 15.65 ± 5.083            | 14.36 ± 5.001             |
| 5          | 12.92 ± 4.412           | 14.86 ± 5.686            | 13.62 ± 5.707             |
| 10         | 12.03 ± 6.076           | 12.09 ± 4.734            | 11.88 ± 5.051             |
| 15         | 11.28 ± 4.240           | 11.20 ± 4.728            | 11.97 ± 6.200             |
| 30         | 10.67 ± 4.301           | 11.23 ± 4.526            | 9.977 ± 5.919             |
